# Supplementary figures and images for: The Effectiveness and Safety of Probiotic Supplements for Psoriasis: A Systematic Review and Meta-Analysis of Randomized Controlled Trials and Preclinical Trials
Source: Hindawi journal article supplement (doi:10.1155/2021/7552546), 2021-12-13

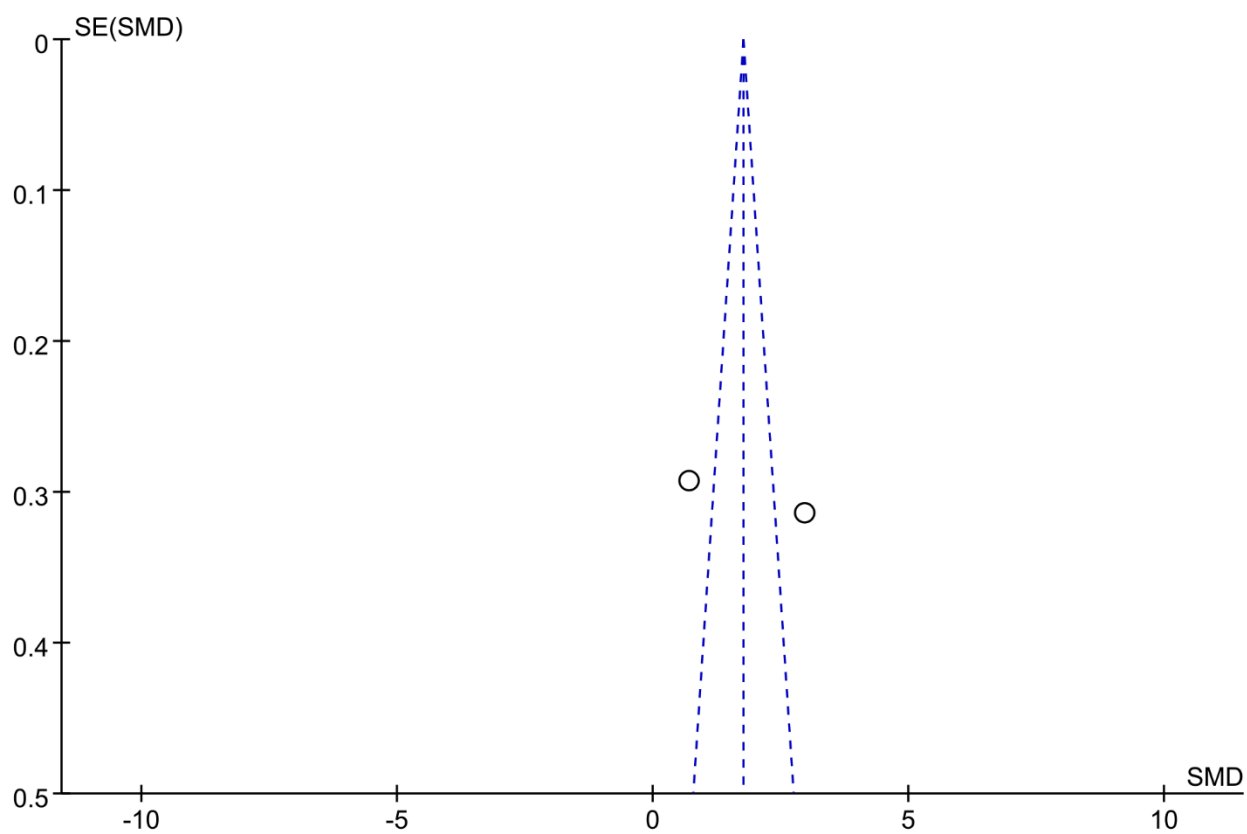

Figure S1 The funnel chart of PASI

Supplement: f1 [file 7552546.f1.zip]
